# Supplementary material
Source: PubMed Central journal article supplement (PMC4597145)

**Online Supporting Information for**  
**“Facile Discovery of Cell-surface Protein Targets of Cancer Cell Aptamers”**  
by  
Tao Bing, Dihua Shangguan and Yinsheng Wang

**Table S1.** Specificity of Sgc-3b and Sgc-4e aptamers to different cell lines.

| Cell lines  | Origin                                | Sgc-3b | Sgc-4e |
|-------------|---------------------------------------|--------|--------|
| RAEC        | rat aortic endothelial cells          | -      | -      |
| MRC-5       | human fetal lung fibroblast           | -      | ++     |
| A549        | human alveolar basal epithelial cells | -      | -      |
| Hela        | human cervical cancer                 | -      | -      |
| Huh-7       | human hepatoma                        | -      | -      |
| T24         | human bladder carcinoma               | -      | ++     |
| SK-Hep-1    | human hepatocellular carcinoma        | -      | +++    |
| MCF-7       | human breast adenocarcinoma           | -      | -      |
| MCF-7R      | human breast adenocarcinoma           | -      | +++    |
| SKOV-3      | human ovarian carcinoma               | -      | +      |
| K562        | human myelogenous leukemia            | -      | -      |
| MDA-MB-231  | human breast cancer                   | -      | -      |
| A431        | human epithelial carcinoma            | -      | -      |
| Jurkat E6-1 | human T-cell leukemia                 | +++    | ++++   |
| HCT-8       | human ileocecal adenocarcinoma        | -      | -      |
| HEK-293     | human embryonic kidney                | -      | ++     |
| PC-3        | human prostate cancer                 | -      | -      |
| Hut-78      | human T cell lymphoma                 | -      | -      |
| LoVo        | human colon cancer                    | -      | -      |

The binding capacity of the aptamer to the cells: -, <10%; +, 10-35%; ++, 35-60%; +++, 60-85%; +++++, >85%.

**Table S2.** The identification of endogenous biotinylated proteins with or without formaldehyde cross-linking using. The data represent the means and standard deviations of results obtained from three independent SILAC experiments.

| Refseq Protein Accession | Gene Symbol | Protein Name                                                               | Unique Peptides | Sequence coverage [%] | PEP <sup>[a]</sup> | Protein Abundance Ratio (streptavidin beads/ biotin-saturated streptavidin beads) |                  |
|--------------------------|-------------|----------------------------------------------------------------------------|-----------------|-----------------------|--------------------|-----------------------------------------------------------------------------------|------------------|
|                          |             |                                                                            |                 |                       |                    | With Cross-linking                                                                | No Cross-linking |
| NP_000911                | PC          | Pyruvate carboxylase                                                       | 11              | 13.1                  | 0                  | 17.5±1.2                                                                          | 13.7±3.4         |
| NP_942131                | ACACA       | Isoform 4 of Acetyl-CoA carboxylase 1                                      | 22              | 11.7                  | 0                  | >20                                                                               | 17±2.4           |
| NP_000273                | PCCA        | propionyl-coenzyme A carboxylase, $\alpha$ polypeptide isoform a precursor | 4               | 6.9                   | 2.48E-85           | >20                                                                               | 18.7±2.6         |
| NP_000523                | PCCB        | Propionyl coenzyme A carboxylase, $\beta$ polypeptide, isoform CRA_c       | 9               | 22.4                  | 2.9E-263           | >20                                                                               | >20              |
| NP_064551                | MCCC1       | Methylcrotonoyl-CoA carboxylase subunit $\alpha$                           | 7               | 14.1                  | 9.1E-178           | >20                                                                               | 14±4.1           |

<sup>[a]</sup>PEP, the posterior error probability. This value essentially operates as a p-value, where smaller is better.

**Fig. S1.** A) Binding of Sgc-3b to Jurkat E6-1 cells in the absence or presence of  $Mg^{2+}$  (5 mM),  $Ca^{2+}$  (5 mM) or EDTA (5 mM). B) Binding of Sgc-4e to Jurkat E6-1 cells in the absence or presence of  $Mg^{2+}$  (5 mM),  $Ca^{2+}$  (5 mM) or EDTA (5 mM). C) Fluorescence of Jurkat E6-1 cells cross-linked with Sgc-4e in the presence of  $Mg^{2+}$  or EDTA in the buffer for different periods of time.

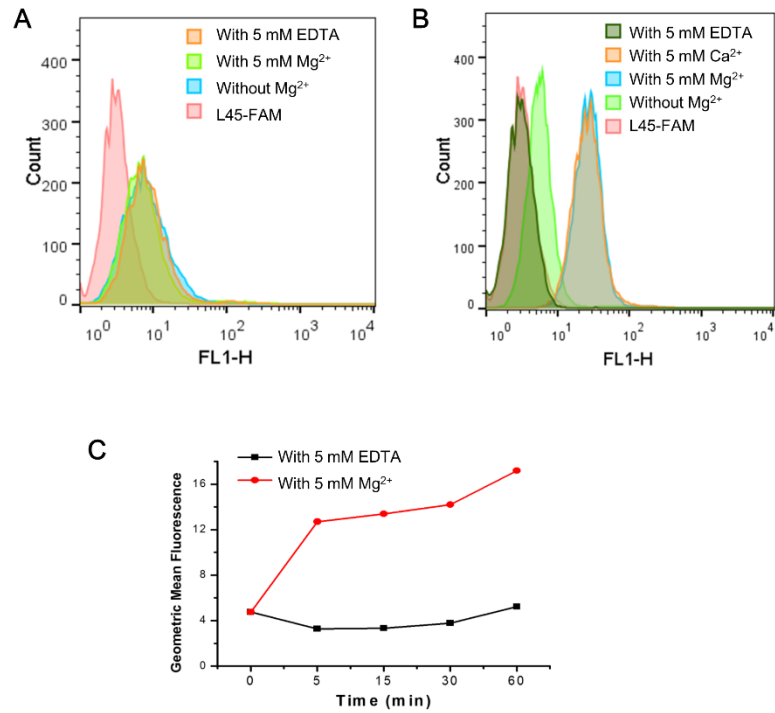

**Fig. S2.** A) Binding of Sgc-3b to Jurkat E6-1 cells after cross-linking (Control) and elution of aptamer-target complex using 1% Triton X-100. B) Binding of Sgc-4e to Jurkat E6-1 cells following cross-linking and elution of aptamer-target complex using 1% Triton X-100 or 2% Triton X-100 and 0.4% SDS.

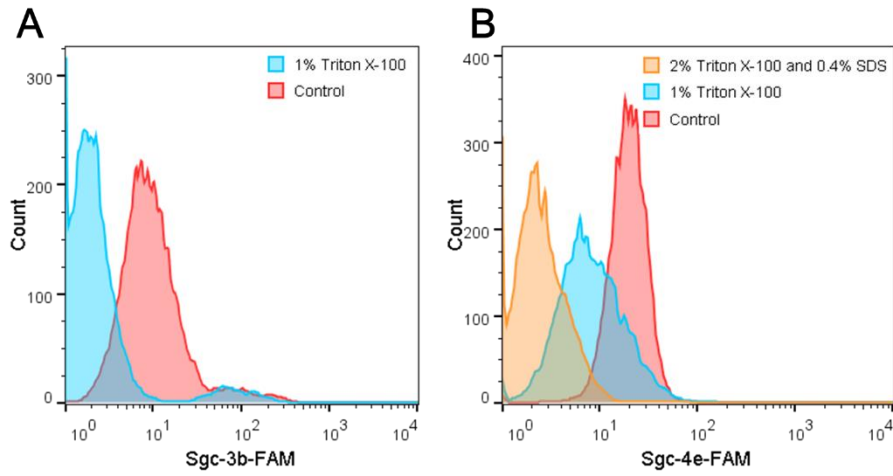

**Fig. S3.** Fluorescence images of streptavidin-coated beads (GE company) pulling down the aptamer-target complex from Jurkat E6-1 cells: A) Blank; B) aptamer Sgc-3b; C) aptamer Sgc-4e.

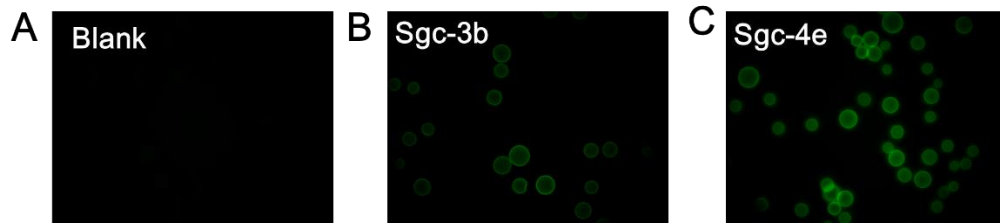

**Fig. S4.** A) Silver-stained SDS-PAGE (10%) of proteins that were pulled down using streptavidin-coated beads (SA) or biotin-saturated streptavidin-coated beads (SA-biotin). B) Silver-stained SDS-PAGE (10%) of proteins that were pulled down using streptavidin beads coated with Sgc-3b or Sgc-4e.

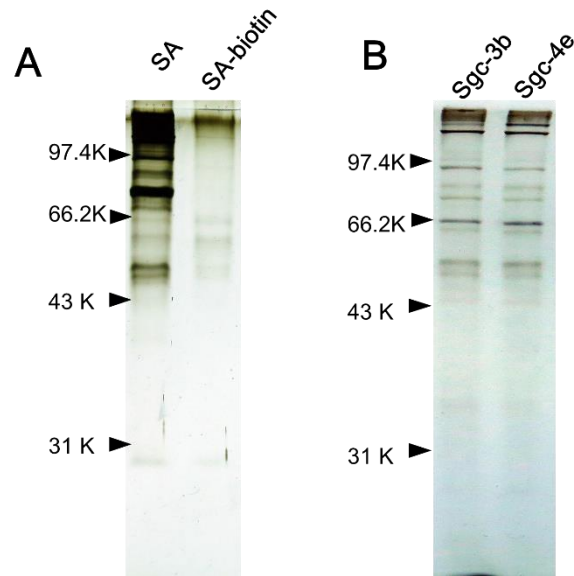

**Fig. S5.** Flow cytometry assay results showed the expression of CD62L, CD49d or CD29 on K562(A), HCT-8(B), LoVo(C), PC-3(D), MD-MB-231(E), MCF-7(F), MCF-7R(G), HEK-293(H), MRC-5(I) and SK-Hep-1(J) cell lines. IgG-PE, which do not bind to cells, was used as negative control.

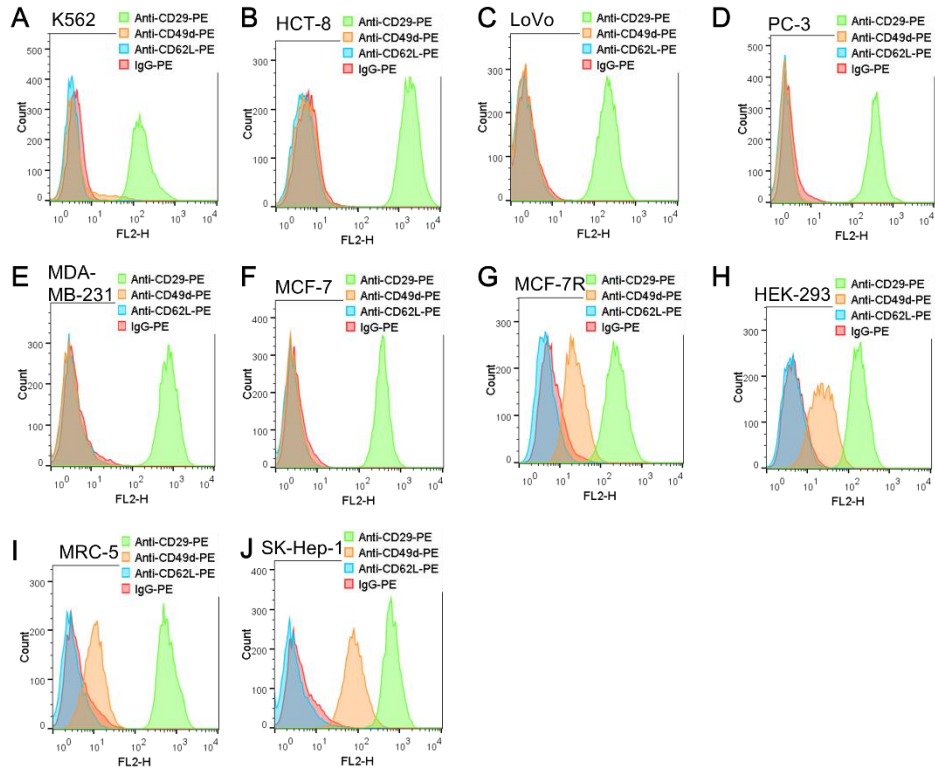



**Fig. S6.** Representative ESI-MS and MS/MS of a tryptic peptide from CD49d (the target protein for aptamer Sgc-4e). R\* designates the heavy arginine. Shown in (A) and (B) are the ESI-MS for the light ( $m/z$  543.3 for the monoisotopic peak of the  $[M+2H]^{2+}$  ion) and heavy ( $m/z$  546.3 for the monoisotopic peak of the  $[M+2H]^{2+}$  ion) arginine-containing peptide observed in forward and reverse SILAC experiments. Displayed in (C) and (D) are the MS/MS for the  $[M+2H]^{2+}$  ions of the heavy- and light-arginine-bearing peptide.

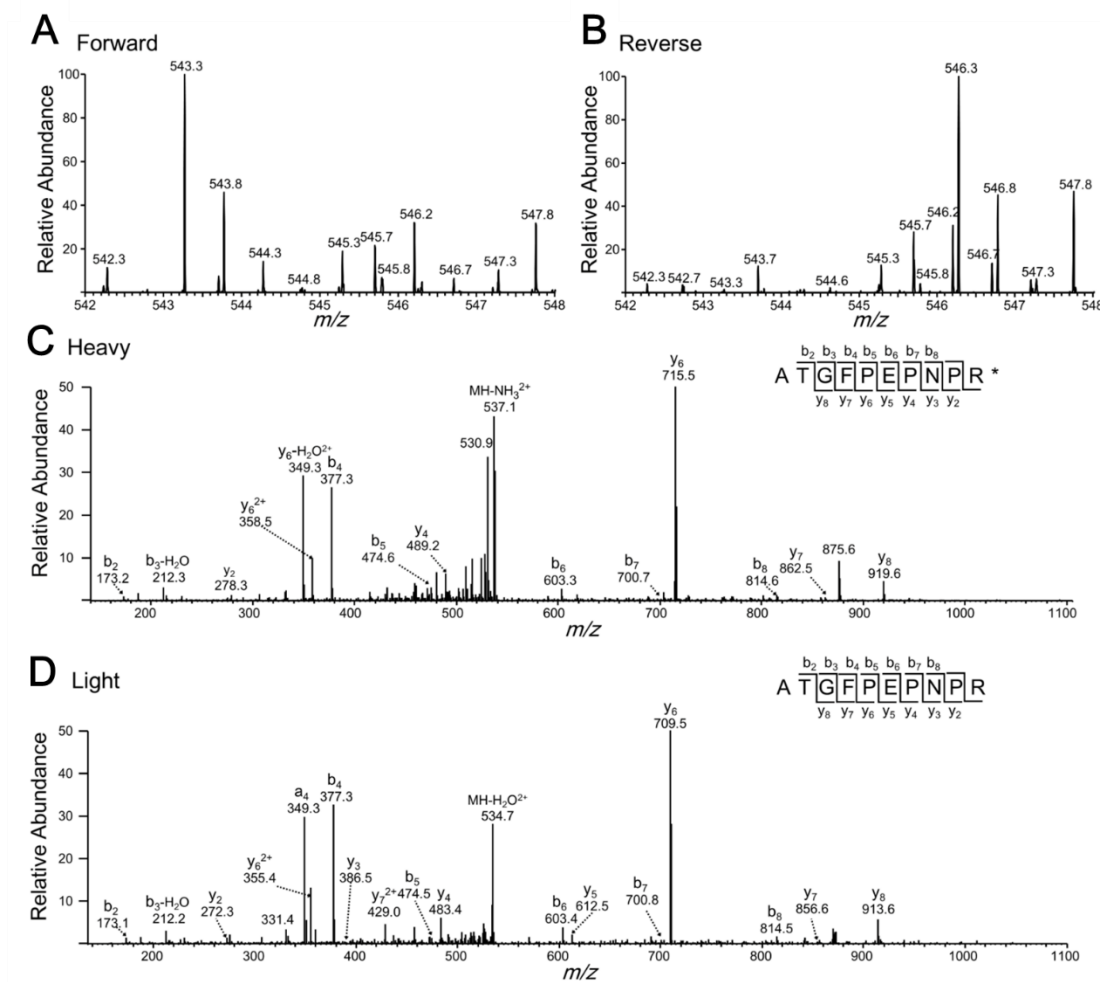

**Fig. S7.** Representative ESI-MS and MS/MS of a tryptic peptide from CD29 (the target protein for aptamer Sgc-4e). K\* designates the heavy lysine. Shown in (A) and (B) are the ESI-MS for the light ( $m/z$  508.3 for the monoisotopic peak of the  $[M+2H]^{2+}$  ion) and heavy ( $m/z$  512.3 for the monoisotopic peak of the  $[M+2H]^{2+}$  ion) lysine-containing peptide observed in forward and reverse SILAC experiments. Displayed in (C) and (D) are the MS/MS for the  $[M+2H]^{2+}$  ions of the heavy- and light-lysine-bearing peptide, respectively.

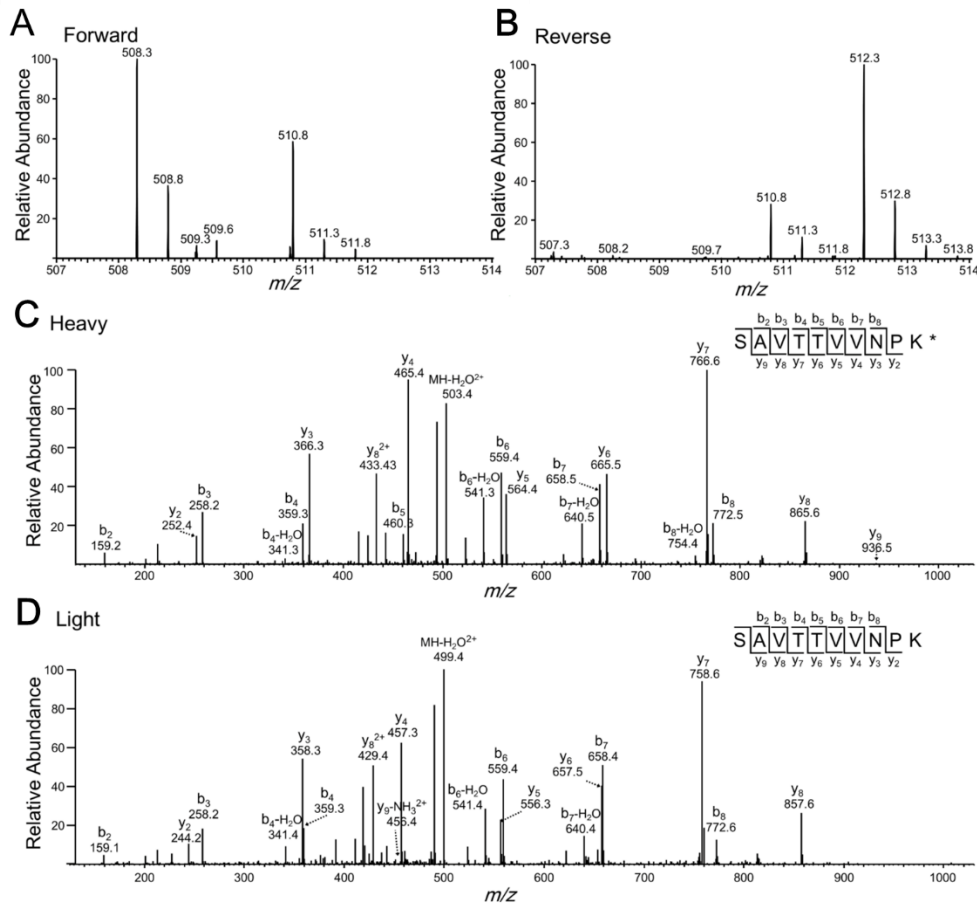

**Fig. S8.** Representative ESI-MS and MS/MS of a tryptic peptide from talin-1 (the target protein for aptamer Sgc-4e). R\* designates the heavy arginine. Shown in (A) and (B) are the ESI-MS for the light ( $m/z$  508.6 for the monoisotopic peak of the  $[M+2H]^{3+}$  ion) and heavy ( $m/z$  510.6 for the monoisotopic peak of the  $[M+2H]^{3+}$  ion) arginine-containing peptide observed in forward and reverse SILAC experiments. Displayed in (C) and (D) are the MS/MS for the  $[M+2H]^{3+}$  ions of the heavy- and light-arginine-bearing peptide.

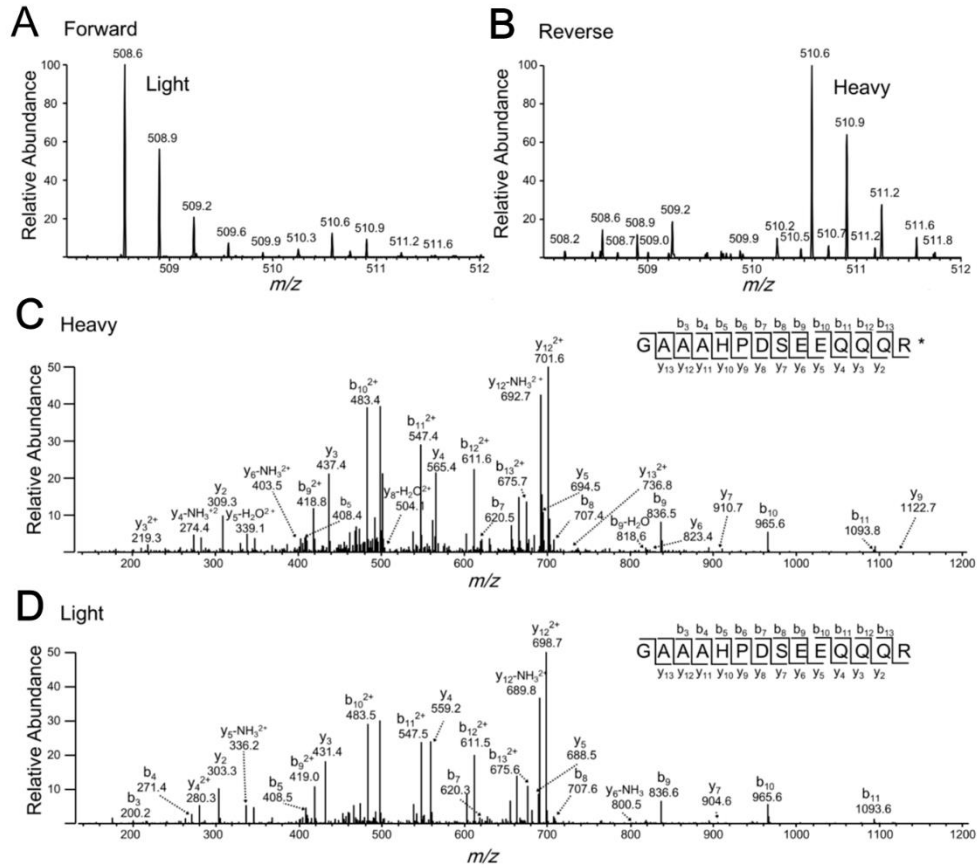

Supplement: supp_M115.051243_mcp.M115.051243-1.pdf [file supp_M115.051243_mcp.M115.051243-1.pdf]
